# Supplementary material for: Metabolomics study of flavonoids in Coreopsis tinctoria of different origins by UPLC–MS/MS
Source: PeerJ. 2022 Dec 19;10:e14580. doi: 10.7717/peerj.14580 (PMC9774014; doi:10.7717/peerj.14580)
Supplement: Supplemental Information 1 [file peerj-10-14580-s001.xlsx]

## Sheet: level_web_mark
Index	Compounds	Class	TX-1	TX-2	TX-3	YT-1	YT-2	YT-3	SY-1	SY-2	SY-3	MWXS211154D_R1	MWXS211154D_R2
Flavonoid_06	Diosmetin	Flavones	14.7184508	11.8577906	9.79106455	6.4043771	5.83421935	4.46025704	8.54589783	6.01155047	6.784225	9.24844378	9.31674975
Flavonoid_11	Hydroxysafflor yellow A	-	0.312606794	0.459816691	1.79259634	0.807436267	0.865359195	1.05838853	0.687120743	0.911100416	0.63346	7.57023092	8.15314058
Flavonoid_114	6''-O-Acetylglycitin	Isoflavanones	0.630195574	0.626632899	0.472447013	0.466106301	0.385320881	0.255504202	0.388991228	0.362164412	0.24849125	0.525055221	0.552676969
Flavonoid_126	Eriodictyol	Flavanones	1012.69686	975.072359	927.018304	697.195767	507.638889	659.038557	815.201238	724.830905	720.9275	721.546185	693.262712
Flavonoid_130	Isobavachalcone	Chalcones	0.00877974781	0.00534980704	0.00465973025	0.00447556518	0.00377188697	0.00425279288	0.00474690402	0.00420496878	0.00451175	1.31701556	1.25018195
Flavonoid_137	Tiliroside	Flavonols	0.112514668	0.12765726	0.103040944	0.0576551227	0.0840419061	0.061188087	0.126633127	0.140205775	0.144981	1.91613454	1.81081256
Flavonoid_139	Dihydrokaempferol	Flavanonols	28.5120947	24.4946937	26.3721098	17.679822	17.6446839	18.4484676	20.6164861	20.5189646	20.66095	20.2265562	20.758998
Flavonoid_143	Jaceosidin	Flavones	0.0439613999	0.0377334781	0.0363415222	0.0556721982	0.0523366858	0.0528860603	0.083748452	0.131023673	0.0630125	1.42245733	1.50211117
Flavonoid_154	Vitexin	Flavone glycosides	0.241070252	0.202584901	0.249048651	0.248232323	0.248893678	0.270202669	0.263266254	0.337372529	0.2592125	0.675281124	0.560605683
Flavonoid_157	Isomangiferin	Xanthones	0.371006176	0.280557164	0.295146917	0.164215729	0.156911398	0.163894958	0.140915635	0.153008845	0.1385635	2.69216867	2.77991027
Flavonoid_16	7,4'-Di-O-methylapigenin	Flavones	0.0716021616	0.063592137	0.0629865125	0.06350481	0.061532567	0.0614636678	0.0766749226	0.0653938606	0.0641545	1.78870733	1.77082752
Flavonoid_160	Apigenin 7-glucoside	Flavones	5.85676788	3.45740473	4.01473988	4.76599327	4.7147749	4.41737519	4.20116099	4.0687565	3.614225	3.68571787	3.64830508
Flavonoid_165	Homoplantaginin	Flavones	1.51158775	1.00912928	0.999891618	0.527979798	0.505914751	0.489792388	0.647143963	0.357367326	0.4395975	0.782966867	0.779217348
Flavonoid_166	Genkwanin	Flavones	0.00771453937	0.00483350217	0.00554501445	0.0076492304	0.0083651341	0.0112818586	0.0105968008	0.00776997919	0.00850475	2.0128012	2.13462114
Flavonoid_169	Quercetin 3-O-(6''-galloyl)-β-D-galactopyranoside	Flavonols	0.34257334	0.327715871	0.290019268	0.183057961	0.102520594	0.162122343	0.128272446	0.243933663	0.1004675	1.81348143	1.77330758
Flavonoid_175	Afzelin	Flavonols	0.0158715646	0.0104416305	0.0184012524	0.044996152	0.0531295498	0.0770479486	0.0248690144	0.0275645161	0.0196121	0.94125251	0.924675972
Flavonoid_176	Naringenin-7-glucoside	Flavanones	539.305198	559.937289	517.72158	625.512266	642.291667	669.57736	630.892673	617.770552	629.1325	641.24749	627.953639
Flavonoid_177	Phloretin	Chalcones	0.0156227226	0.0158188857	0.0168057803	0.00996483886	0.00837191092	0.0086871478	0.0138951754	0.00951350156	0.010541975	1.89209588	1.85616899
Flavonoid_18	Baicalein	Flavones	0.108772259	0.10583671	0.069305395	0.0799365079	0.0915701628	0.0690657439	0.0838116615	0.0844305411	0.10297025	4.58245482	4.77188435
Flavonoid_188	Laricitrin	Flavonols	20.4294133	20.2746503	13.0586946	8.94992785	6.97789751	7.83430549	9.59584623	12.0874089	9.0183	8.73993474	8.76251246
Flavonoid_191	Naringenin chalcone	Chalcones	24.9452136	22.0246261	25.878131	12.8393218	10.6894636	13.5952546	15.6359391	12.1615505	13.151575	12.782003	12.5521186
Flavonoid_197	Isorhamnetin 3-O-glucoside	Flavonols	4.51863098	3.81946454	4.78764451	1.14235931	1.27869492	1.79089718	1.62095975	1.85645682	1.1192	1.09168675	1.04016201
Flavonoid_200	Benzylideneacetophenone	Chalcones	0.0108602676	0.00579394597	0.00663668112	0.0241568062	0.0168774904	0.0211579585	0.0216115583	0.0200104839	0.02625525	2.08423193	1.992333
Flavonoid_201	Trilobatin	Chalcones	1.48607823	1.91244091	1.79257948	2.0491847	1.72294301	1.93617647	2.90670795	2.14549428	2.9961	2.97818775	2.99847956
Flavonoid_41	Hesperetin	Flavanones	0.199332733	0.0425827303	0.0261604046	0.0269853295	0.0164880268	0.02959565	0.0854721362	0.0308116545	0.0482175	1.50223394	1.46056082
Flavonoid_56	Taxifolin	Flavanonols	209.406073	220.775929	217.916426	114.705868	87.0057471	97.6989619	175.621001	177.474506	166.08675	163.908635	154.334247
Flavonoid_57	Rutin	Flavonols	0.248345857	0.244956585	0.367066474	0.252710438	0.633029215	0.273482452	0.377376161	0.771467222	0.96202	1.96520833	2.1060992
Flavonoid_58	Isorhamnetin	Flavonols	1.90795162	1.71148336	1.47929672	0.321096681	0.54868295	0.337254078	0.752776058	0.441599896	0.52666	1.30679719	1.28961117
Flavonoid_59	Hispidulin	Flavones	0.172620432	0.182339363	0.131375963	0.0637400192	0.0703311782	0.052945131	0.216516254	0.436930281	0.1025625	1.55773845	1.55377368
Flavonoid_69	Liquiritin	Flavanones	0.520651055	0.686743849	0.568155106	0.513737374	0.499027778	0.335420168	0.394099587	0.286451613	0.52987	0.330891064	0.503462114
Flavonoid_72	Apigenin	Flavones	23.4168811	15.4416305	20.2566474	23.5930014	23.0030891	26.3719723	21.9565273	18.9048127	15.556	15.6061245	16.0166999
Flavonoid_73	Genistin	Isoflavanones	6.96878538	4.33878437	5.24229287	6.06178451	6.1404454	5.90086505	5.26323529	4.9799948	4.703775	4.706501	4.57971087
Flavonoid_86	Avicularin	Flavonols	4.74078744	4.32368548	4.54971098	1.75791967	2.35818008	1.60984676	1.6444711	1.11618887	1.7210975	1.99216616	1.98373131
Flavonoid_98	Hyperoside	Flavonols	11.8967319	10.0381573	10.7224711	9.23112073	13.1463841	16.9457489	10.7961816	9.75379813	8.728225	11.276004	10.5025424
Flavonoid_02	Miquelianin	Flavonols	2.8242666	1.97306561	1.37115366	1.07369168	1.54874282	0.427721206	2.02363261	1.22847815	0.4034575	1.71223394	1.36030907
Flavonoid_03	4,4'-Dimethoxychalcone	Chalcones	0.00638417396	0.00396876507	0.00525628613	0.00651604137	0.00532080939	0.00875565991	0.0222277606	0.0301938085	0.017699775	2.03254016	1.96834247
Flavonoid_108	Pinocembrin	Flavanones	5.69076171	4.32378196	3.93574181	2.2459115	1.94810345	2.33869254	3.51560888	3.1539282	3.265825	5.64759036	5.47634596
Flavonoid_112	Echinatin	Chalcones	0.22258106	0.128156295	0.202234827	0.22001419	0.227527299	0.243669056	0.189372033	0.1397859	0.1393285	0.757735944	0.720294118
Flavonoid_117	Engeletin	Flavanonols	1.11208183	1.21900627	0.924812139	1.61771765	2.10894875	1.91270143	1.64213364	1.56163111	1.86061	2.3695005	2.19800598
Flavonoid_12	Liquiritigenin	Flavanones	0.274009264	0.244611674	0.271006744	0.339105339	0.382203065	0.368410776	0.563859649	0.56201873	0.5228675	1.21007028	1.1903664
Flavonoid_122	7-Hydroxy-4H-chromen-4-one	Phenonic acids	45.7946475	48.2426435	45.8766859	32.3496873	27.4315134	39.021997	31.6687307	35.3129553	27.34175	29.18499	30.137338
Flavonoid_123	2''-O-Galloylhyperin	Flavonols	0.126374936	0.136494211	0.150742293	0.108012506	N/A	0.127904597	0.135122033	0.119991415	0.12326075	0.880988956	1.13921236
Flavonoid_138	Baimaside	Flavonols	0.738497169	0.546927159	0.568964355	0.509379509	0.447902299	0.424935739	0.590454076	0.530091051	0.628085	2.11984689	1.95028166
Flavonoid_167	Oroxin B	Flavones	0.0360486361	0.0311430294	0.0328427264	0.0772508418	0.0711704981	0.0696744933	0.0658962848	0.0658975026	0.06424625	0.66939257	0.676657527
Flavonoid_179	Poncirin	Flavanones	0.0995697375	0.116359383	0.0814915703	0.0540882636	0.0723716475	0.0589280771	0.124611455	0.164559573	0.1370375	1.42092871	1.37945912
Flavonoid_181	Demethyltexasin	Isoflavanones	0.405187854	0.341478534	0.321618497	0.339189514	0.435984195	0.333272368	0.461932405	0.345457856	0.3217225	1.31293424	1.27636839
Flavonoid_182	2'-Hydroxydaidzein	Isoflavanones	0.667810087	0.473456343	0.453824663	0.498920154	0.558218391	0.489802274	0.504184727	0.472479188	0.4844075	1.29837098	1.25538385
Flavonoid_184	Afzelechin	Flavanols	0.115472723	0.130727689	0.143085742	0.188798461	0.144896791	0.167464656	0.164032766	0.292437565	0.16775775	0.567314257	0.501308574
Flavonoid_190	7,4'-Dihydroxyflavone	Flavones	0.0481518271	0.0152062229	0.0309903661	0.012800938	0.0255941092	0.0343895205	0.177300052	0.122635796	0.05791925	0.864703815	0.800054835
Flavonoid_194	Quercimeritrin	Flavonols	106.410448	97.2551857	104.750241	45.8588264	39.7641284	58.9797331	33.8648091	65.8046306	26.92375	43.4786647	36.501994
Flavonoid_23	Quercetin	Flavonols	95.5501801	90.2879884	98.7037572	24.3768639	27.3431513	20.151829	42.1929825	36.7330905	36.442	33.7060743	34.1772183
Flavonoid_25	Apigenin-7-glucuronide	Flavones	0.782058672	0.377255186	0.273684971	1.06742184	2.02129789	0.739789916	0.882143963	0.755634755	0.1919725	0.776433233	0.78189681
Flavonoid_28	Scutellarin	Flavones	36.0810602	14.3770622	12.5914499	20.5357864	32.4408525	13.131389	16.8202786	19.6045786	4.10775	4.47289157	4.16171486
Flavonoid_30	Isoliquiritigenin	Chalcones	8.32920741	9.039315	8.27822736	11.6832371	13.6293822	12.3576372	13.196388	13.0756243	13.943325	15.0577058	14.8025673
Flavonoid_32	Daidzin	Isoflavanones	0.14206665	0.170923058	0.128205925	0.286433381	0.423675766	0.392056352	0.25452064	0.285991155	0.2543525	0.238639809	0.28253988
Flavonoid_35	Syringaldehyde	Phenonic acids	13.139861	11.6653883	12.5818642	7.12224627	6.39454023	6.25103806	9.85523736	8.71997919	7.6469	8.0061496	7.81590229
Flavonoid_40	Dihydromyricetin	Flavanonols	0.459065878	0.495226725	0.389219653	0.223811929	0.225618774	0.223260257	0.250003612	0.285658169	0.2928225	0.838200301	0.80221336
Flavonoid_43	Kaempferol	Flavonols	7.17828101	4.73273034	7.06247592	1.80962482	2.07889128	2.08803262	2.16005676	2.32034599	2.3965425	3.26362952	3.39586241
Flavonoid_50	Luteolin	Flavones	466.713845	423.393632	430.416667	333.177008	365.842912	343.492338	392.136223	291.555671	291.7	287.213855	288.683948
Flavonoid_61	Chrysin	Flavones	1.51994081	0.886900627	0.897456647	0.973504089	1.02785441	1.01404597	1.4302322	1.67656087	1.3323675	3.09884538	3.17966102
Flavonoid_63	Tectorigenin	Isoflavanones	0.208331704	0.149467197	0.142635838	0.0788066378	0.0776613985	0.0572936233	0.127916667	0.0887036941	0.0925465	1.6763002	1.69775174
Flavonoid_90	Cynaroside	Flavones	99.862069	61.8598649	66.3420039	79.3222703	70.1405651	74.8188334	73.8480392	71.014308	75.35975	70.3446285	66.1527916
Flavonoid_106	Typhaneoside	Flavonols	N/A	N/A	0.109532755	0.0613665224	0.159106322	0.0651589224	0.0731914345	0.0895052029	0.08354225	0.788220382	0.868237787
Flavonoid_118	Narcissin	Flavones	N/A	N/A	N/A	0.0307467532	0.31552682	0.0652402373	0.0517306502	0.0347182622	0.0457285	0.541418173	0.455578265
Flavonoid_54	Isorhamnetin-3-O-neohespeidoside	Flavonols	N/A	N/A	N/A	0.00370759981	0.00881393678	0.00470771132	0.0073873065	0.0173418314	0.0165577	0.300198293	0.347432702
Flavonoid_74	Schaftoside	Flavone glycosides	N/A	N/A	N/A	0.100187831	0.0983029215	0.178645082	0.69993808	0.185468783	0.3991775	1.69235693	1.7932328
Flavonoid_76	Sakuranetin	Flavones	N/A	N/A	N/A	0.00291948052	0.00251036877	0.00258442907	0.0736158411	0.021708923	0.03360375	1.93863454	1.91525673
Flavonoid_04	Isosilybin	Flavanonols	0.0377236233	N/A	N/A	0.0723929774	0.0940289751	0.0621374197	0.0464690402	N/A	0.0943085	0.884497992	0.757422732
Flavonoid_48	Narirutin	Flavanones	0.031002316	0.0458897733	N/A	N/A	N/A	N/A	0.0599674923	0.0449508325	0.07473525	0.438885542	0.432208375
Flavonoid_84	(-)-Epigallocatechin	Flavanols	N/A	N/A	N/A	N/A	0.229606561	5.29542758	1.03899639	0.809771072	1.9602825	4.62685743	4.60343968
Flavonoid_99	Acacetin	Flavones	0.00684866186	0.0042905451	N/A	0.0025997114	N/A	N/A	0.00380567595	N/A	N/A	1.55539408	1.53785643
Flavonoid_13	Isoorientin	Flavone glycosides	N/A	N/A	N/A	N/A	1.39138889	N/A	0.462414861	N/A	0.3627375	1.30041416	1.47482054
Flavonoid_150	(-)-Catechin gallate	Flavanols	N/A	N/A	N/A	N/A	N/A	0.115343055	0.149589525	0.138991415	0.1554105	0.580567269	0.52667996
Flavonoid_162	Tectochrysin	Flavones	0.0062641791	N/A	N/A	N/A	0.00457385057	0.00543069698	N/A	N/A	N/A	2.30629518	2.27909521
Flavonoid_173	6-Methylflavone	Flavones	0.00839724653	0.00542797877	0.00866726879	N/A	N/A	N/A	N/A	N/A	N/A	2.33123996	2.31700897
Flavonoid_52	Kaempferol 3-neohesperidoside	Flavonols	N/A	N/A	N/A	0.137962241	0.0552701149	0.0226583786	N/A	N/A	N/A	0.412138554	0.384499003
Flavonoid_135	Theaflavin 3,3'-digallate	-	1.0800386	N/A	N/A	N/A	N/A	N/A	1.08406863	N/A	N/A	1.07241717	1.04291127
Flavonoid_15	Neohesperidin	Flavanones	0.0334943387	0.0403523878	0.0435308285	N/A	N/A	N/A	N/A	N/A	N/A	0.845384036	0.754810568
Flavonoid_171	6-Hydroxyflavone	Flavones	0.0261160576	0.023053835	0.0239083574	N/A	N/A	N/A	N/A	N/A	N/A	1.65227661	1.73919492
Flavonoid_189	Robinin	Flavonols	N/A	N/A	N/A	N/A	N/A	0.0990056846	0.105755418	N/A	N/A	0.844816767	0.811632602
Flavonoid_44	4-Hydroxychalcone	Chalcones	0.0002823649	N/A	N/A	N/A	0.000776975575	N/A	0.00024073065	N/A	N/A	2.07492972	2.13188435
Flavonoid_82	Chrysosplenetin	Flavones	0.0153059959	0.00395660878	N/A	N/A	N/A	N/A	N/A	N/A	N/A	2.19855422	2.19710618
Flavonoid_88	5-O-Demethylnobiletin	Flavones	0.00278793103	0.00195563435	N/A	N/A	N/A	N/A	N/A	N/A	N/A	2.82645582	2.92721834
Flavonoid_89	Silibinin	Flavanonols	0.143891405	0.169299083	0.190155347	N/A	N/A	N/A	N/A	N/A	N/A	1.36601908	1.37883848
Flavonoid_07	Troxerutin	-	N/A	N/A	N/A	N/A	N/A	N/A	0.0524050568	0.0443636837	N/A	2.24013052	2.58272682
Flavonoid_10	3,4'-Dihydroxyflavone	Flavones	0.577910448	N/A	N/A	N/A	N/A	N/A	N/A	N/A	N/A	2.6562751	2.71218843
Flavonoid_100	Sophoraflavanone G	Flavanones	0.00420064334	N/A	N/A	N/A	N/A	N/A	N/A	N/A	N/A	2.20159137	2.13969342
Flavonoid_105	(E)-Flavokawain A	Phenonic acids	0.00793841997	N/A	N/A	N/A	N/A	N/A	N/A	N/A	N/A	1.63415412	1.6413011
Flavonoid_110	Kaempferide	Flavonols	0.0365944416	N/A	N/A	N/A	N/A	N/A	N/A	N/A	N/A	1.54726155	1.5389681
Flavonoid_116	4'-O-Methylbavachalcone	Chalcones	0.00137216675	N/A	N/A	N/A	N/A	N/A	N/A	N/A	N/A	1.28420181	1.20695414
Flavonoid_125	Amentoflavone	Biflavonoids	N/A	N/A	N/A	N/A	N/A	0.0847933762	N/A	N/A	N/A	1.25024096	1.14652792
Flavonoid_133	β-Anhydroicaritin	-	1.26159804	N/A	N/A	N/A	N/A	N/A	N/A	N/A	N/A	2.62816265	2.86774676
Flavonoid_142	Sciadopitysin	-	0.0341289243	N/A	N/A	N/A	N/A	N/A	N/A	N/A	N/A	2.06906376	2.06485045
Flavonoid_145	Procyanidin B2	Anthocyanins	N/A	N/A	N/A	N/A	N/A	0.597518537	N/A	N/A	0.15535875	1.18455823	1.22295364
Flavonoid_158	Isosakuranetin	Flavanones	N/A	N/A	N/A	N/A	N/A	N/A	0.0113270382	N/A	N/A	2.03885793	2.08407029
Flavonoid_159	Icaritin	Flavonols	0.130904014	N/A	N/A	N/A	N/A	N/A	N/A	N/A	N/A	0.920100402	0.933098205
Flavonoid_17	Flavokawain C	Phenonic acids	0.00313769943	N/A	N/A	N/A	N/A	N/A	N/A	N/A	N/A	1.66209839	1.62938185
Flavonoid_170	Licoflavonol	Flavonols	0.115487133	N/A	N/A	N/A	N/A	N/A	N/A	N/A	N/A	0.990102912	0.943185444
Flavonoid_185	3,7-Di-O-methylquercetin	Flavonols	0.0155523675	N/A	N/A	N/A	N/A	N/A	N/A	N/A	N/A	3.09510542	3.06263709
Flavonoid_193	hydroxygenkwanin	Flavones	0.136030623	N/A	N/A	N/A	N/A	N/A	N/A	N/A	N/A	2.06901355	1.98312812
Flavonoid_29	IKarisoside A	Flavones	0.00592375193	N/A	N/A	N/A	N/A	N/A	N/A	N/A	N/A	2.03164157	2.02280658
Flavonoid_34	Isoginkgetin	Biflavonoids	0.0123688369	N/A	N/A	N/A	N/A	N/A	N/A	N/A	N/A	1.93803464	1.98460867
Flavonoid_36	Icariside I	Flavonols	0.00747743181	N/A	N/A	N/A	N/A	N/A	N/A	N/A	N/A	2.20800201	2.3387986
Flavonoid_38	Corylifol A	Isoflavanones	0.00527727741	N/A	N/A	N/A	N/A	N/A	N/A	N/A	N/A	1.44049197	1.43342971
Flavonoid_47	Ginkgetin	Biflavonoids	0.0123622491	N/A	N/A	N/A	N/A	N/A	N/A	N/A	N/A	2.21639558	2.23036142
Flavonoid_53	(E)-Cardamonin	Phenonic acids	0.0044368245	N/A	N/A	N/A	N/A	N/A	N/A	N/A	N/A	1.77563504	1.89414506
Flavonoid_60	Kushenol A	Other flavonoids	0.00294199691	N/A	N/A	N/A	N/A	N/A	N/A	N/A	N/A	1.85383534	1.78012463
Flavonoid_62	Methylophiopogonanone B	Phenonic acids	0.00788224395	N/A	N/A	N/A	N/A	N/A	N/A	N/A	N/A	1.86566767	1.83941426
Flavonoid_91	Morusin	Other flavonoids	0.00447195059	N/A	N/A	N/A	N/A	N/A	N/A	N/A	N/A	1.92752259	1.83350698
Flavonoid_97	Xanthohumol	Chalcones	0.00948345342	N/A	N/A	N/A	N/A	N/A	N/A	N/A	N/A	1.17751757	1.13686441
Flavonoid_05	7-Methoxyisoflavone	Isoflavanones	0.000212805198	N/A	N/A	N/A	N/A	N/A	N/A	N/A	N/A	1.44913655	1.42252742
Flavonoid_103	Scutellarein tetramethyl ether	Flavones	N/A	N/A	N/A	N/A	N/A	N/A	N/A	N/A	N/A	2.58308233	2.55189432
Flavonoid_111	Irisflorentin	Isoflavanones	N/A	N/A	N/A	N/A	N/A	N/A	N/A	N/A	N/A	2.77319277	2.83544367
Flavonoid_115	Quercitrin	Flavonols	N/A	N/A	N/A	N/A	N/A	N/A	N/A	N/A	N/A	0.246329568	0.271338485
Flavonoid_121	Licoisoflavone A	Isoflavanones	N/A	N/A	N/A	N/A	N/A	N/A	N/A	N/A	N/A	1.96400853	1.97701147
Flavonoid_129	Mulberrin	Other flavonoids	N/A	N/A	N/A	N/A	N/A	N/A	N/A	N/A	N/A	1.95679468	1.93568046
Flavonoid_14	Nobiletin	Flavones	N/A	N/A	N/A	N/A	N/A	N/A	N/A	N/A	N/A	2.76629016	2.7331007
Flavonoid_140	Licoflavone A	Flavones	N/A	N/A	N/A	N/A	N/A	N/A	N/A	N/A	N/A	1.71214357	1.73522682
Flavonoid_146	Icariin	Flavonols	N/A	N/A	N/A	N/A	N/A	N/A	N/A	N/A	N/A	0.906935241	0.970338983
Flavonoid_151	Sinensetin	Flavones	N/A	N/A	N/A	N/A	N/A	N/A	N/A	N/A	N/A	2.47661396	2.449833
Flavonoid_155	Spinosin	Flavone glycosides	N/A	N/A	N/A	N/A	N/A	N/A	N/A	N/A	N/A	0.672843876	0.670219342
Flavonoid_161	Diosmin	Flavones	N/A	N/A	N/A	N/A	N/A	N/A	N/A	N/A	N/A	0.265496988	0.255934696
Flavonoid_168	5,7,3',4'-Tetramethoxyflavone	Flavones	N/A	N/A	N/A	N/A	N/A	N/A	N/A	N/A	N/A	2.03055723	2.07060319
Flavonoid_183	2'-Hydroxygenistein	Isoflavanones	N/A	N/A	N/A	N/A	N/A	N/A	N/A	N/A	N/A	1.13290663	1.15478315
Flavonoid_19	beta-Mangostin	Xanthones	N/A	N/A	N/A	N/A	N/A	N/A	N/A	N/A	N/A	0.411782129	0.447963609
Flavonoid_192	Orientin	Flavone glycosides	N/A	N/A	N/A	N/A	N/A	N/A	N/A	N/A	N/A	2.68047189	2.37099701
Flavonoid_199	Persicogenin	Flavanones	N/A	N/A	N/A	N/A	N/A	N/A	N/A	N/A	N/A	1.73663404	1.80440429
Flavonoid_20	Sagittatoside A	Flavonols	N/A	N/A	N/A	N/A	N/A	N/A	N/A	N/A	N/A	2.69048695	2.65670489
Flavonoid_204	Linarin	Flavones	N/A	N/A	N/A	N/A	N/A	N/A	N/A	N/A	N/A	1.03638805	0.773651545
Flavonoid_21	Tangeretin	Flavones	N/A	N/A	N/A	N/A	N/A	N/A	N/A	N/A	N/A	3.11315261	3.15643071
Flavonoid_26	Formononetin	Isoflavanones	N/A	N/A	N/A	N/A	N/A	0.000768000494	N/A	N/A	N/A	1.82942018	1.85088235
Flavonoid_39	Trimethylapigenin	Flavones	N/A	N/A	N/A	N/A	N/A	N/A	N/A	N/A	N/A	1.79314006	1.89526919
Flavonoid_42	Nicotiflorin	Flavones	N/A	N/A	N/A	N/A	N/A	N/A	N/A	N/A	N/A	0.4462751	0.446829511
Flavonoid_46	Eupatorin	Flavones	N/A	N/A	N/A	N/A	N/A	N/A	N/A	N/A	N/A	2.13487701	2.19106929
Flavonoid_49	Baicalin	Flavones	N/A	N/A	N/A	N/A	N/A	N/A	N/A	N/A	N/A	2.15788655	2.07500499
Flavonoid_78	Eriocitrin	Flavanones	N/A	N/A	N/A	N/A	N/A	N/A	N/A	N/A	N/A	0.735233434	0.680825025
Flavonoid_81	Tricin	Flavones	N/A	N/A	N/A	N/A	N/A	N/A	N/A	N/A	N/A	1.19041165	1.18727069
Flavonoid_08	5-Methyl-7-methoxyisoflavone	Isoflavanones	N/A	N/A	N/A	N/A	N/A	N/A	N/A	N/A	N/A	1.25043675	1.21837238
Flavonoid_09	Genistein	Isoflavanones	N/A	N/A	N/A	N/A	N/A	N/A	N/A	N/A	N/A	0.82689759	0.864344467
Flavonoid_101	Hesperidin	Flavanones	N/A	N/A	N/A	N/A	N/A	N/A	N/A	N/A	N/A	0.162977159	0.15581007
Flavonoid_104	Corylin	Isoflavanones	N/A	N/A	N/A	N/A	N/A	N/A	N/A	N/A	N/A	2.01138805	1.93400299
Flavonoid_107	Wogonin	Flavones	N/A	N/A	N/A	N/A	N/A	N/A	N/A	N/A	N/A	2.20241717	2.20835743
Flavonoid_109	Deguelin	-	N/A	N/A	N/A	N/A	N/A	N/A	N/A	N/A	N/A	3.16521084	3.02731805
Flavonoid_120	Bavachinin	Flavanones	N/A	N/A	N/A	N/A	N/A	N/A	N/A	N/A	N/A	1.67788404	1.64738285
Flavonoid_124	Silychristin	Flavanonols	N/A	N/A	N/A	N/A	N/A	N/A	N/A	N/A	N/A	0.675122992	0.665994516
Flavonoid_127	Daidzein	Isoflavanones	N/A	N/A	N/A	N/A	N/A	N/A	N/A	N/A	N/A	2.6436496	2.64952642
Flavonoid_128	5-Hydroxyflavone	Flavones	N/A	N/A	N/A	N/A	N/A	N/A	N/A	N/A	N/A	2.10579317	2.03400798
Flavonoid_131	Neobavaisoflavone	Isoflavanones	N/A	N/A	N/A	N/A	N/A	N/A	N/A	N/A	N/A	1.97564508	1.90879611
Flavonoid_132	Alpinetin	Flavanones	N/A	N/A	N/A	N/A	N/A	N/A	N/A	N/A	N/A	1.6765989	1.62686441
Flavonoid_134	Loureirin B	Chalcones	N/A	N/A	N/A	N/A	N/A	N/A	N/A	N/A	N/A	2.04722641	2.01302841
Flavonoid_136	6,2'-Dihydroxyflavone	Flavones	N/A	N/A	N/A	N/A	N/A	N/A	N/A	N/A	N/A	0.757595382	0.746782154
Flavonoid_144	Kavain	Phenonic acids	N/A	N/A	N/A	N/A	N/A	N/A	N/A	N/A	N/A	2.78842871	2.83915753
Flavonoid_147	(-)-Epicatechin	Flavanols	N/A	N/A	N/A	N/A	N/A	N/A	N/A	N/A	N/A	0.742186245	0.799788136
Flavonoid_148	Baohuoside I	Flavonols	N/A	N/A	N/A	N/A	N/A	N/A	N/A	N/A	N/A	2.75968876	2.63292622
Flavonoid_149	Farrerol	Flavanones	N/A	N/A	N/A	N/A	N/A	N/A	N/A	N/A	N/A	1.75071536	1.74252742
Flavonoid_152	Ononin	Isoflavanones	N/A	N/A	N/A	N/A	N/A	N/A	N/A	N/A	N/A	0.422781124	0.391089232
Flavonoid_153	Glycitin	Isoflavanones	N/A	N/A	N/A	N/A	N/A	N/A	N/A	N/A	N/A	0.169783133	0.151889831
Flavonoid_156	Wogonoside	Flavones	N/A	N/A	N/A	N/A	N/A	N/A	N/A	N/A	N/A	1.68317771	1.69489282
Flavonoid_163	4'-Hydroxychalcone	Chalcones	N/A	N/A	N/A	N/A	N/A	N/A	N/A	N/A	N/A	2.02370984	2.03145065
Flavonoid_164	5-Methoxyflavone	Flavones	N/A	N/A	N/A	N/A	N/A	N/A	N/A	N/A	N/A	1.831624	1.83723579
Flavonoid_172	Kaempferitrin	Flavonols	N/A	N/A	N/A	N/A	N/A	N/A	N/A	N/A	N/A	0.216860944	0.217014706
Flavonoid_174	Glabridin	Isoflavanones	N/A	N/A	N/A	N/A	N/A	N/A	N/A	N/A	N/A	1.96099649	1.92374626
Flavonoid_178	Myricitrin	Flavonols	N/A	N/A	N/A	N/A	N/A	N/A	N/A	N/A	N/A	0.817904116	0.680663011
Flavonoid_186	Prunetin	Isoflavanones	N/A	N/A	N/A	N/A	N/A	N/A	N/A	N/A	N/A	2.14394829	2.13624875
Flavonoid_187	Tricetin	Flavones	N/A	N/A	N/A	N/A	N/A	N/A	N/A	N/A	N/A	1.52188002	1.54372383
Flavonoid_195	(-)-Gallocatechin	Flavanols	N/A	N/A	N/A	N/A	N/A	N/A	N/A	N/A	N/A	1.31602661	1.29133101
Flavonoid_196	Pedalitin	Flavones	N/A	N/A	N/A	N/A	N/A	N/A	N/A	N/A	N/A	1.45115713	1.48110419
Flavonoid_198	5,7-Dihydroxy-3',4',5'-trimethoxyflavone	Flavones	N/A	N/A	N/A	N/A	N/A	N/A	N/A	N/A	N/A	2.53672189	2.55712861
Flavonoid_203	Limocitrin	Flavones	N/A	N/A	N/A	N/A	N/A	N/A	N/A	N/A	N/A	0.734219378	0.714272183
Flavonoid_22	Neohesperidin dihydrochalcone	Chalcones	N/A	N/A	N/A	N/A	N/A	N/A	N/A	N/A	N/A	1.91505271	1.83170987
Flavonoid_24	4',5-Dihydroxyflavone	Flavones	N/A	N/A	N/A	N/A	N/A	N/A	N/A	N/A	N/A	1.87461596	1.83505982
Flavonoid_27	Flavonol	Flavonols	N/A	N/A	N/A	N/A	N/A	N/A	N/A	N/A	N/A	4.50883534	4.36737288
Flavonoid_31	Naringin Dihydrochalcone	Chalcones	N/A	N/A	N/A	N/A	N/A	N/A	N/A	N/A	N/A	2.04878263	1.93612911
Flavonoid_33	Oroxin A	Flavones	N/A	N/A	N/A	N/A	N/A	N/A	N/A	N/A	N/A	1.43906124	1.53951147
Flavonoid_37	Kurarinone	Other flavonoids	N/A	N/A	N/A	N/A	N/A	N/A	N/A	N/A	N/A	2.20508534	2.17824526
Flavonoid_51	3'-Methoxypuerarin	Flavone glycosides	N/A	N/A	N/A	N/A	N/A	N/A	N/A	N/A	N/A	0.930138052	0.944277168
Flavonoid_55	(-)-Catechin	Flavanols	N/A	N/A	N/A	N/A	N/A	N/A	N/A	N/A	N/A	0.498165161	0.476697408
Flavonoid_64	Scutellarein	Flavones	N/A	N/A	N/A	N/A	N/A	N/A	N/A	N/A	N/A	2.97233936	2.6334995
Flavonoid_66	Puerarin	Isoflavanones	N/A	N/A	N/A	N/A	N/A	N/A	N/A	N/A	N/A	1.0235492	1.06459123
Flavonoid_68	Mangiferin	Xanthones	N/A	N/A	N/A	N/A	N/A	N/A	N/A	N/A	N/A	1.90921436	1.88609422
Flavonoid_70	Licochalcone E	Chalcones	N/A	N/A	N/A	N/A	N/A	N/A	N/A	N/A	N/A	1.86559488	1.905334
Flavonoid_71	Galangin	Flavones	N/A	N/A	N/A	N/A	N/A	N/A	N/A	N/A	N/A	2.04716867	2.07431456
Flavonoid_75	Licochalcone C	Chalcones	N/A	N/A	N/A	N/A	N/A	N/A	N/A	N/A	N/A	1.89053966	1.92558325
Flavonoid_77	Epimedin A	-	N/A	N/A	N/A	N/A	N/A	N/A	N/A	N/A	N/A	1.77003263	1.87171735
Flavonoid_79	Ligustroflavone	Phenonic acids	N/A	N/A	N/A	N/A	N/A	N/A	N/A	N/A	N/A	0.248552711	0.275324028
Flavonoid_80	(-)-Gallocatechin gallate	Flavanols	N/A	N/A	N/A	N/A	N/A	N/A	N/A	N/A	N/A	0.825446787	0.898392323
Flavonoid_83	Epmedin C	-	N/A	N/A	N/A	N/A	N/A	N/A	N/A	N/A	N/A	1.54458835	1.79794367
Flavonoid_87	Noricaritin	Flavonols	N/A	N/A	N/A	N/A	N/A	N/A	N/A	N/A	N/A	1.9942997	1.9305683
Flavonoid_93	Bavachin	Flavanones	N/A	N/A	N/A	N/A	N/A	N/A	N/A	N/A	N/A	1.96577811	1.91707378
Flavonoid_94	Epimedin B	-	N/A	N/A	N/A	N/A	N/A	N/A	N/A	N/A	N/A	2.24704066	1.92786142
Flavonoid_95	Calycosin	Isoflavanones	N/A	N/A	N/A	N/A	N/A	N/A	N/A	N/A	N/A	1.29154869	1.27004736
Flavonoid_96	Calycosin-7-O-β-D-glucoside	Isoflavanones	N/A	N/A	N/A	N/A	N/A	N/A	N/A	N/A	N/A	0.146837349	0.123399302
Flavonoid_113	Taxifolin 7-O-rhamnoside	Flavanonols	N/A	N/A	N/A	N/A	N/A	N/A	N/A	N/A	N/A	N/A	N/A
Flavonoid_119	Astragalin	Flavonols	N/A	N/A	N/A	N/A	N/A	N/A	N/A	N/A	N/A	N/A	N/A
Flavonoid_141	Isosakuranin	Flavanones	N/A	N/A	N/A	N/A	N/A	N/A	N/A	N/A	N/A	N/A	N/A
Flavonoid_202	Sieboldin	Chalcones	N/A	N/A	N/A	N/A	N/A	N/A	N/A	N/A	N/A	N/A	N/A
Flavonoid_65	Phlorizin	Chalcones	N/A	N/A	N/A	N/A	N/A	N/A	N/A	N/A	N/A	N/A	N/A
Flavonoid_85	Methylnissolin-3-O-glucoside	-	N/A	N/A	N/A	N/A	N/A	N/A	N/A	N/A	N/A	N/A	N/A
Flavonoid_01	Astilbin	Flavanonols	N/A	N/A	N/A	N/A	N/A	N/A	N/A	N/A	N/A	N/A	N/A
Flavonoid_102	Theaflavin	-	N/A	N/A	N/A	N/A	N/A	N/A	N/A	N/A	N/A	N/A	N/A
Flavonoid_180	Spiraeoside	Flavonols	N/A	N/A	N/A	N/A	N/A	N/A	N/A	N/A	N/A	N/A	N/A
Flavonoid_45	3,7,4'-Trihydroxyflavone	Flavonols	N/A	N/A	N/A	N/A	N/A	N/A	N/A	N/A	N/A	N/A	N/A
Flavonoid_67	Fisetin	Flavonols	N/A	N/A	N/A	N/A	N/A	N/A	N/A	N/A	N/A	N/A	N/A
Flavonoid_92	Myricetin	Flavonols	N/A	N/A	N/A	N/A	N/A	N/A	N/A	N/A	N/A	N/A	N/A

## Sheet: level_web_mark.sci
Index	Compounds	Class	TX-1	TX-2	TX-3	YT-1	YT-2	YT-3	SY-1	SY-2	SY-3	MWXS211154D_R1	MWXS211154D_R2
Flavonoid_06	Diosmetin	Flavones	1.47E+01	1.19E+01	9.79E+00	6.40E+00	5.83E+00	4.46E+00	8.55E+00	6.01E+00	6.78E+00	9.25E+00	9.32E+00
Flavonoid_11	Hydroxysafflor yellow A	-	3.13E-01	4.60E-01	1.79E+00	8.07E-01	8.65E-01	1.06E+00	6.87E-01	9.11E-01	6.33E-01	7.57E+00	8.15E+00
Flavonoid_114	6''-O-Acetylglycitin	Isoflavanones	6.30E-01	6.27E-01	4.72E-01	4.66E-01	3.85E-01	2.56E-01	3.89E-01	3.62E-01	2.48E-01	5.25E-01	5.53E-01
Flavonoid_126	Eriodictyol	Flavanones	1.01E+03	9.75E+02	9.27E+02	6.97E+02	5.08E+02	6.59E+02	8.15E+02	7.25E+02	7.21E+02	7.22E+02	6.93E+02
Flavonoid_130	Isobavachalcone	Chalcones	8.78E-03	5.35E-03	4.66E-03	4.48E-03	3.77E-03	4.25E-03	4.75E-03	4.20E-03	4.51E-03	1.32E+00	1.25E+00
Flavonoid_137	Tiliroside	Flavonols	1.13E-01	1.28E-01	1.03E-01	5.77E-02	8.40E-02	6.12E-02	1.27E-01	1.40E-01	1.45E-01	1.92E+00	1.81E+00
Flavonoid_139	Dihydrokaempferol	Flavanonols	2.85E+01	2.45E+01	2.64E+01	1.77E+01	1.76E+01	1.84E+01	2.06E+01	2.05E+01	2.07E+01	2.02E+01	2.08E+01
Flavonoid_143	Jaceosidin	Flavones	4.40E-02	3.77E-02	3.63E-02	5.57E-02	5.23E-02	5.29E-02	8.37E-02	1.31E-01	6.30E-02	1.42E+00	1.50E+00
Flavonoid_154	Vitexin	Flavone glycosides	2.41E-01	2.03E-01	2.49E-01	2.48E-01	2.49E-01	2.70E-01	2.63E-01	3.37E-01	2.59E-01	6.75E-01	5.61E-01
Flavonoid_157	Isomangiferin	Xanthones	3.71E-01	2.81E-01	2.95E-01	1.64E-01	1.57E-01	1.64E-01	1.41E-01	1.53E-01	1.39E-01	2.69E+00	2.78E+00
Flavonoid_16	7,4'-Di-O-methylapigenin	Flavones	7.16E-02	6.36E-02	6.30E-02	6.35E-02	6.15E-02	6.15E-02	7.67E-02	6.54E-02	6.42E-02	1.79E+00	1.77E+00
Flavonoid_160	Apigenin 7-glucoside	Flavones	5.86E+00	3.46E+00	4.01E+00	4.77E+00	4.71E+00	4.42E+00	4.20E+00	4.07E+00	3.61E+00	3.69E+00	3.65E+00
Flavonoid_165	Homoplantaginin	Flavones	1.51E+00	1.01E+00	1.00E+00	5.28E-01	5.06E-01	4.90E-01	6.47E-01	3.57E-01	4.40E-01	7.83E-01	7.79E-01
Flavonoid_166	Genkwanin	Flavones	7.71E-03	4.83E-03	5.55E-03	7.65E-03	8.37E-03	1.13E-02	1.06E-02	7.77E-03	8.50E-03	2.01E+00	2.13E+00
Flavonoid_169	Quercetin 3-O-(6''-galloyl)-β-D-galactopyranoside	Flavonols	3.43E-01	3.28E-01	2.90E-01	1.83E-01	1.03E-01	1.62E-01	1.28E-01	2.44E-01	1.00E-01	1.81E+00	1.77E+00
Flavonoid_175	Afzelin	Flavonols	1.59E-02	1.04E-02	1.84E-02	4.50E-02	5.31E-02	7.70E-02	2.49E-02	2.76E-02	1.96E-02	9.41E-01	9.25E-01
Flavonoid_176	Naringenin-7-glucoside	Flavanones	5.39E+02	5.60E+02	5.18E+02	6.26E+02	6.42E+02	6.70E+02	6.31E+02	6.18E+02	6.29E+02	6.41E+02	6.28E+02
Flavonoid_177	Phloretin	Chalcones	1.56E-02	1.58E-02	1.68E-02	9.96E-03	8.37E-03	8.69E-03	1.39E-02	9.51E-03	1.05E-02	1.89E+00	1.86E+00
Flavonoid_18	Baicalein	Flavones	1.09E-01	1.06E-01	6.93E-02	7.99E-02	9.16E-02	6.91E-02	8.38E-02	8.44E-02	1.03E-01	4.58E+00	4.77E+00
Flavonoid_188	Laricitrin	Flavonols	2.04E+01	2.03E+01	1.31E+01	8.95E+00	6.98E+00	7.83E+00	9.60E+00	1.21E+01	9.02E+00	8.74E+00	8.76E+00
Flavonoid_191	Naringenin chalcone	Chalcones	2.49E+01	2.20E+01	2.59E+01	1.28E+01	1.07E+01	1.36E+01	1.56E+01	1.22E+01	1.32E+01	1.28E+01	1.26E+01
Flavonoid_197	Isorhamnetin 3-O-glucoside	Flavonols	4.52E+00	3.82E+00	4.79E+00	1.14E+00	1.28E+00	1.79E+00	1.62E+00	1.86E+00	1.12E+00	1.09E+00	1.04E+00
Flavonoid_200	Benzylideneacetophenone	Chalcones	1.09E-02	5.79E-03	6.64E-03	2.42E-02	1.69E-02	2.12E-02	2.16E-02	2.00E-02	2.63E-02	2.08E+00	1.99E+00
Flavonoid_201	Trilobatin	Chalcones	1.49E+00	1.91E+00	1.79E+00	2.05E+00	1.72E+00	1.94E+00	2.91E+00	2.15E+00	3.00E+00	2.98E+00	3.00E+00
Flavonoid_41	Hesperetin	Flavanones	1.99E-01	4.26E-02	2.62E-02	2.70E-02	1.65E-02	2.96E-02	8.55E-02	3.08E-02	4.82E-02	1.50E+00	1.46E+00
Flavonoid_56	Taxifolin	Flavanonols	2.09E+02	2.21E+02	2.18E+02	1.15E+02	8.70E+01	9.77E+01	1.76E+02	1.77E+02	1.66E+02	1.64E+02	1.54E+02
Flavonoid_57	Rutin	Flavonols	2.48E-01	2.45E-01	3.67E-01	2.53E-01	6.33E-01	2.73E-01	3.77E-01	7.71E-01	9.62E-01	1.97E+00	2.11E+00
Flavonoid_58	Isorhamnetin	Flavonols	1.91E+00	1.71E+00	1.48E+00	3.21E-01	5.49E-01	3.37E-01	7.53E-01	4.42E-01	5.27E-01	1.31E+00	1.29E+00
Flavonoid_59	Hispidulin	Flavones	1.73E-01	1.82E-01	1.31E-01	6.37E-02	7.03E-02	5.29E-02	2.17E-01	4.37E-01	1.03E-01	1.56E+00	1.55E+00
Flavonoid_69	Liquiritin	Flavanones	5.21E-01	6.87E-01	5.68E-01	5.14E-01	4.99E-01	3.35E-01	3.94E-01	2.86E-01	5.30E-01	3.31E-01	5.03E-01
Flavonoid_72	Apigenin	Flavones	2.34E+01	1.54E+01	2.03E+01	2.36E+01	2.30E+01	2.64E+01	2.20E+01	1.89E+01	1.56E+01	1.56E+01	1.60E+01
Flavonoid_73	Genistin	Isoflavanones	6.97E+00	4.34E+00	5.24E+00	6.06E+00	6.14E+00	5.90E+00	5.26E+00	4.98E+00	4.70E+00	4.71E+00	4.58E+00
Flavonoid_86	Avicularin	Flavonols	4.74E+00	4.32E+00	4.55E+00	1.76E+00	2.36E+00	1.61E+00	1.64E+00	1.12E+00	1.72E+00	1.99E+00	1.98E+00
Flavonoid_98	Hyperoside	Flavonols	1.19E+01	1.00E+01	1.07E+01	9.23E+00	1.31E+01	1.69E+01	1.08E+01	9.75E+00	8.73E+00	1.13E+01	1.05E+01
Flavonoid_02	Miquelianin	Flavonols	2.82E+00	1.97E+00	1.37E+00	1.07E+00	1.55E+00	4.28E-01	2.02E+00	1.23E+00	4.03E-01	1.71E+00	1.36E+00
Flavonoid_03	4,4'-Dimethoxychalcone	Chalcones	6.38E-03	3.97E-03	5.26E-03	6.52E-03	5.32E-03	8.76E-03	2.22E-02	3.02E-02	1.77E-02	2.03E+00	1.97E+00
Flavonoid_108	Pinocembrin	Flavanones	5.69E+00	4.32E+00	3.94E+00	2.25E+00	1.95E+00	2.34E+00	3.52E+00	3.15E+00	3.27E+00	5.65E+00	5.48E+00
Flavonoid_112	Echinatin	Chalcones	2.23E-01	1.28E-01	2.02E-01	2.20E-01	2.28E-01	2.44E-01	1.89E-01	1.40E-01	1.39E-01	7.58E-01	7.20E-01
Flavonoid_117	Engeletin	Flavanonols	1.11E+00	1.22E+00	9.25E-01	1.62E+00	2.11E+00	1.91E+00	1.64E+00	1.56E+00	1.86E+00	2.37E+00	2.20E+00
Flavonoid_12	Liquiritigenin	Flavanones	2.74E-01	2.45E-01	2.71E-01	3.39E-01	3.82E-01	3.68E-01	5.64E-01	5.62E-01	5.23E-01	1.21E+00	1.19E+00
Flavonoid_122	7-Hydroxy-4H-chromen-4-one	Phenonic acids	4.58E+01	4.82E+01	4.59E+01	3.23E+01	2.74E+01	3.90E+01	3.17E+01	3.53E+01	2.73E+01	2.92E+01	3.01E+01
Flavonoid_123	2''-O-Galloylhyperin	Flavonols	1.26E-01	1.36E-01	1.51E-01	1.08E-01	N/A	1.28E-01	1.35E-01	1.20E-01	1.23E-01	8.81E-01	1.14E+00
Flavonoid_138	Baimaside	Flavonols	7.38E-01	5.47E-01	5.69E-01	5.09E-01	4.48E-01	4.25E-01	5.90E-01	5.30E-01	6.28E-01	2.12E+00	1.95E+00
Flavonoid_167	Oroxin B	Flavones	3.60E-02	3.11E-02	3.28E-02	7.73E-02	7.12E-02	6.97E-02	6.59E-02	6.59E-02	6.42E-02	6.69E-01	6.77E-01
Flavonoid_179	Poncirin	Flavanones	9.96E-02	1.16E-01	8.15E-02	5.41E-02	7.24E-02	5.89E-02	1.25E-01	1.65E-01	1.37E-01	1.42E+00	1.38E+00
Flavonoid_181	Demethyltexasin	Isoflavanones	4.05E-01	3.41E-01	3.22E-01	3.39E-01	4.36E-01	3.33E-01	4.62E-01	3.45E-01	3.22E-01	1.31E+00	1.28E+00
Flavonoid_182	2'-Hydroxydaidzein	Isoflavanones	6.68E-01	4.73E-01	4.54E-01	4.99E-01	5.58E-01	4.90E-01	5.04E-01	4.72E-01	4.84E-01	1.30E+00	1.26E+00
Flavonoid_184	Afzelechin	Flavanols	1.15E-01	1.31E-01	1.43E-01	1.89E-01	1.45E-01	1.67E-01	1.64E-01	2.92E-01	1.68E-01	5.67E-01	5.01E-01
Flavonoid_190	7,4'-Dihydroxyflavone	Flavones	4.82E-02	1.52E-02	3.10E-02	1.28E-02	2.56E-02	3.44E-02	1.77E-01	1.23E-01	5.79E-02	8.65E-01	8.00E-01
Flavonoid_194	Quercimeritrin	Flavonols	1.06E+02	9.73E+01	1.05E+02	4.59E+01	3.98E+01	5.90E+01	3.39E+01	6.58E+01	2.69E+01	4.35E+01	3.65E+01
Flavonoid_23	Quercetin	Flavonols	9.56E+01	9.03E+01	9.87E+01	2.44E+01	2.73E+01	2.02E+01	4.22E+01	3.67E+01	3.64E+01	3.37E+01	3.42E+01
Flavonoid_25	Apigenin-7-glucuronide	Flavones	7.82E-01	3.77E-01	2.74E-01	1.07E+00	2.02E+00	7.40E-01	8.82E-01	7.56E-01	1.92E-01	7.76E-01	7.82E-01
Flavonoid_28	Scutellarin	Flavones	3.61E+01	1.44E+01	1.26E+01	2.05E+01	3.24E+01	1.31E+01	1.68E+01	1.96E+01	4.11E+00	4.47E+00	4.16E+00
Flavonoid_30	Isoliquiritigenin	Chalcones	8.33E+00	9.04E+00	8.28E+00	1.17E+01	1.36E+01	1.24E+01	1.32E+01	1.31E+01	1.39E+01	1.51E+01	1.48E+01
Flavonoid_32	Daidzin	Isoflavanones	1.42E-01	1.71E-01	1.28E-01	2.86E-01	4.24E-01	3.92E-01	2.55E-01	2.86E-01	2.54E-01	2.39E-01	2.83E-01
Flavonoid_35	Syringaldehyde	Phenonic acids	1.31E+01	1.17E+01	1.26E+01	7.12E+00	6.39E+00	6.25E+00	9.86E+00	8.72E+00	7.65E+00	8.01E+00	7.82E+00
Flavonoid_40	Dihydromyricetin	Flavanonols	4.59E-01	4.95E-01	3.89E-01	2.24E-01	2.26E-01	2.23E-01	2.50E-01	2.86E-01	2.93E-01	8.38E-01	8.02E-01
Flavonoid_43	Kaempferol	Flavonols	7.18E+00	4.73E+00	7.06E+00	1.81E+00	2.08E+00	2.09E+00	2.16E+00	2.32E+00	2.40E+00	3.26E+00	3.40E+00
Flavonoid_50	Luteolin	Flavones	4.67E+02	4.23E+02	4.30E+02	3.33E+02	3.66E+02	3.43E+02	3.92E+02	2.92E+02	2.92E+02	2.87E+02	2.89E+02
Flavonoid_61	Chrysin	Flavones	1.52E+00	8.87E-01	8.97E-01	9.74E-01	1.03E+00	1.01E+00	1.43E+00	1.68E+00	1.33E+00	3.10E+00	3.18E+00
Flavonoid_63	Tectorigenin	Isoflavanones	2.08E-01	1.49E-01	1.43E-01	7.88E-02	7.77E-02	5.73E-02	1.28E-01	8.87E-02	9.25E-02	1.68E+00	1.70E+00
Flavonoid_90	Cynaroside	Flavones	9.99E+01	6.19E+01	6.63E+01	7.93E+01	7.01E+01	7.48E+01	7.38E+01	7.10E+01	7.54E+01	7.03E+01	6.62E+01
Flavonoid_106	Typhaneoside	Flavonols	N/A	N/A	1.10E-01	6.14E-02	1.59E-01	6.52E-02	7.32E-02	8.95E-02	8.35E-02	7.88E-01	8.68E-01
Flavonoid_118	Narcissin	Flavones	N/A	N/A	N/A	3.07E-02	3.16E-01	6.52E-02	5.17E-02	3.47E-02	4.57E-02	5.41E-01	4.56E-01
Flavonoid_54	Isorhamnetin-3-O-neohespeidoside	Flavonols	N/A	N/A	N/A	3.71E-03	8.81E-03	4.71E-03	7.39E-03	1.73E-02	1.66E-02	3.00E-01	3.47E-01
Flavonoid_74	Schaftoside	Flavone glycosides	N/A	N/A	N/A	1.00E-01	9.83E-02	1.79E-01	7.00E-01	1.85E-01	3.99E-01	1.69E+00	1.79E+00
Flavonoid_76	Sakuranetin	Flavones	N/A	N/A	N/A	2.92E-03	2.51E-03	2.58E-03	7.36E-02	2.17E-02	3.36E-02	1.94E+00	1.92E+00
Flavonoid_04	Isosilybin	Flavanonols	3.77E-02	N/A	N/A	7.24E-02	9.40E-02	6.21E-02	4.65E-02	N/A	9.43E-02	8.84E-01	7.57E-01
Flavonoid_48	Narirutin	Flavanones	3.10E-02	4.59E-02	N/A	N/A	N/A	N/A	6.00E-02	4.50E-02	7.47E-02	4.39E-01	4.32E-01
Flavonoid_84	(-)-Epigallocatechin	Flavanols	N/A	N/A	N/A	N/A	2.30E-01	5.30E+00	1.04E+00	8.10E-01	1.96E+00	4.63E+00	4.60E+00
Flavonoid_99	Acacetin	Flavones	6.85E-03	4.29E-03	N/A	2.60E-03	N/A	N/A	3.81E-03	N/A	N/A	1.56E+00	1.54E+00
Flavonoid_13	Isoorientin	Flavone glycosides	N/A	N/A	N/A	N/A	1.39E+00	N/A	4.62E-01	N/A	3.63E-01	1.30E+00	1.47E+00
Flavonoid_150	(-)-Catechin gallate	Flavanols	N/A	N/A	N/A	N/A	N/A	1.15E-01	1.50E-01	1.39E-01	1.55E-01	5.81E-01	5.27E-01
Flavonoid_162	Tectochrysin	Flavones	6.26E-03	N/A	N/A	N/A	4.57E-03	5.43E-03	N/A	N/A	N/A	2.31E+00	2.28E+00
Flavonoid_173	6-Methylflavone	Flavones	8.40E-03	5.43E-03	8.67E-03	N/A	N/A	N/A	N/A	N/A	N/A	2.33E+00	2.32E+00
Flavonoid_52	Kaempferol 3-neohesperidoside	Flavonols	N/A	N/A	N/A	1.38E-01	5.53E-02	2.27E-02	N/A	N/A	N/A	4.12E-01	3.84E-01
Flavonoid_135	Theaflavin 3,3'-digallate	-	1.08E+00	N/A	N/A	N/A	N/A	N/A	1.08E+00	N/A	N/A	1.07E+00	1.04E+00
Flavonoid_15	Neohesperidin	Flavanones	3.35E-02	4.04E-02	4.35E-02	N/A	N/A	N/A	N/A	N/A	N/A	8.45E-01	7.55E-01
Flavonoid_171	6-Hydroxyflavone	Flavones	2.61E-02	2.31E-02	2.39E-02	N/A	N/A	N/A	N/A	N/A	N/A	1.65E+00	1.74E+00
Flavonoid_189	Robinin	Flavonols	N/A	N/A	N/A	N/A	N/A	9.90E-02	1.06E-01	N/A	N/A	8.45E-01	8.12E-01
Flavonoid_44	4-Hydroxychalcone	Chalcones	2.82E-04	N/A	N/A	N/A	7.77E-04	N/A	2.41E-04	N/A	N/A	2.07E+00	2.13E+00
Flavonoid_82	Chrysosplenetin	Flavones	1.53E-02	3.96E-03	N/A	N/A	N/A	N/A	N/A	N/A	N/A	2.20E+00	2.20E+00
Flavonoid_88	5-O-Demethylnobiletin	Flavones	2.79E-03	1.96E-03	N/A	N/A	N/A	N/A	N/A	N/A	N/A	2.83E+00	2.93E+00
Flavonoid_89	Silibinin	Flavanonols	1.44E-01	1.69E-01	1.90E-01	N/A	N/A	N/A	N/A	N/A	N/A	1.37E+00	1.38E+00
Flavonoid_07	Troxerutin	-	N/A	N/A	N/A	N/A	N/A	N/A	5.24E-02	4.44E-02	N/A	2.24E+00	2.58E+00
Flavonoid_10	3,4'-Dihydroxyflavone	Flavones	5.78E-01	N/A	N/A	N/A	N/A	N/A	N/A	N/A	N/A	2.66E+00	2.71E+00
Flavonoid_100	Sophoraflavanone G	Flavanones	4.20E-03	N/A	N/A	N/A	N/A	N/A	N/A	N/A	N/A	2.20E+00	2.14E+00
Flavonoid_105	(E)-Flavokawain A	Phenonic acids	7.94E-03	N/A	N/A	N/A	N/A	N/A	N/A	N/A	N/A	1.63E+00	1.64E+00
Flavonoid_110	Kaempferide	Flavonols	3.66E-02	N/A	N/A	N/A	N/A	N/A	N/A	N/A	N/A	1.55E+00	1.54E+00
Flavonoid_116	4'-O-Methylbavachalcone	Chalcones	1.37E-03	N/A	N/A	N/A	N/A	N/A	N/A	N/A	N/A	1.28E+00	1.21E+00
Flavonoid_125	Amentoflavone	Biflavonoids	N/A	N/A	N/A	N/A	N/A	8.48E-02	N/A	N/A	N/A	1.25E+00	1.15E+00
Flavonoid_133	β-Anhydroicaritin	-	1.26E+00	N/A	N/A	N/A	N/A	N/A	N/A	N/A	N/A	2.63E+00	2.87E+00
Flavonoid_142	Sciadopitysin	-	3.41E-02	N/A	N/A	N/A	N/A	N/A	N/A	N/A	N/A	2.07E+00	2.06E+00
Flavonoid_145	Procyanidin B2	Anthocyanins	N/A	N/A	N/A	N/A	N/A	5.98E-01	N/A	N/A	1.55E-01	1.18E+00	1.22E+00
Flavonoid_158	Isosakuranetin	Flavanones	N/A	N/A	N/A	N/A	N/A	N/A	1.13E-02	N/A	N/A	2.04E+00	2.08E+00
Flavonoid_159	Icaritin	Flavonols	1.31E-01	N/A	N/A	N/A	N/A	N/A	N/A	N/A	N/A	9.20E-01	9.33E-01
Flavonoid_17	Flavokawain C	Phenonic acids	3.14E-03	N/A	N/A	N/A	N/A	N/A	N/A	N/A	N/A	1.66E+00	1.63E+00
Flavonoid_170	Licoflavonol	Flavonols	1.15E-01	N/A	N/A	N/A	N/A	N/A	N/A	N/A	N/A	9.90E-01	9.43E-01
Flavonoid_185	3,7-Di-O-methylquercetin	Flavonols	1.56E-02	N/A	N/A	N/A	N/A	N/A	N/A	N/A	N/A	3.10E+00	3.06E+00
Flavonoid_193	hydroxygenkwanin	Flavones	1.36E-01	N/A	N/A	N/A	N/A	N/A	N/A	N/A	N/A	2.07E+00	1.98E+00
Flavonoid_29	IKarisoside A	Flavones	5.92E-03	N/A	N/A	N/A	N/A	N/A	N/A	N/A	N/A	2.03E+00	2.02E+00
Flavonoid_34	Isoginkgetin	Biflavonoids	1.24E-02	N/A	N/A	N/A	N/A	N/A	N/A	N/A	N/A	1.94E+00	1.98E+00
Flavonoid_36	Icariside I	Flavonols	7.48E-03	N/A	N/A	N/A	N/A	N/A	N/A	N/A	N/A	2.21E+00	2.34E+00
Flavonoid_38	Corylifol A	Isoflavanones	5.28E-03	N/A	N/A	N/A	N/A	N/A	N/A	N/A	N/A	1.44E+00	1.43E+00
Flavonoid_47	Ginkgetin	Biflavonoids	1.24E-02	N/A	N/A	N/A	N/A	N/A	N/A	N/A	N/A	2.22E+00	2.23E+00
Flavonoid_53	(E)-Cardamonin	Phenonic acids	4.44E-03	N/A	N/A	N/A	N/A	N/A	N/A	N/A	N/A	1.78E+00	1.89E+00
Flavonoid_60	Kushenol A	Other flavonoids	2.94E-03	N/A	N/A	N/A	N/A	N/A	N/A	N/A	N/A	1.85E+00	1.78E+00
Flavonoid_62	Methylophiopogonanone B	Phenonic acids	7.88E-03	N/A	N/A	N/A	N/A	N/A	N/A	N/A	N/A	1.87E+00	1.84E+00
Flavonoid_91	Morusin	Other flavonoids	4.47E-03	N/A	N/A	N/A	N/A	N/A	N/A	N/A	N/A	1.93E+00	1.83E+00
Flavonoid_97	Xanthohumol	Chalcones	9.48E-03	N/A	N/A	N/A	N/A	N/A	N/A	N/A	N/A	1.18E+00	1.14E+00
Flavonoid_05	7-Methoxyisoflavone	Isoflavanones	2.13E-04	N/A	N/A	N/A	N/A	N/A	N/A	N/A	N/A	1.45E+00	1.42E+00
Flavonoid_103	Scutellarein tetramethyl ether	Flavones	N/A	N/A	N/A	N/A	N/A	N/A	N/A	N/A	N/A	2.58E+00	2.55E+00
Flavonoid_111	Irisflorentin	Isoflavanones	N/A	N/A	N/A	N/A	N/A	N/A	N/A	N/A	N/A	2.77E+00	2.84E+00
Flavonoid_115	Quercitrin	Flavonols	N/A	N/A	N/A	N/A	N/A	N/A	N/A	N/A	N/A	2.46E-01	2.71E-01
Flavonoid_121	Licoisoflavone A	Isoflavanones	N/A	N/A	N/A	N/A	N/A	N/A	N/A	N/A	N/A	1.96E+00	1.98E+00
Flavonoid_129	Mulberrin	Other flavonoids	N/A	N/A	N/A	N/A	N/A	N/A	N/A	N/A	N/A	1.96E+00	1.94E+00
Flavonoid_14	Nobiletin	Flavones	N/A	N/A	N/A	N/A	N/A	N/A	N/A	N/A	N/A	2.77E+00	2.73E+00
Flavonoid_140	Licoflavone A	Flavones	N/A	N/A	N/A	N/A	N/A	N/A	N/A	N/A	N/A	1.71E+00	1.74E+00
Flavonoid_146	Icariin	Flavonols	N/A	N/A	N/A	N/A	N/A	N/A	N/A	N/A	N/A	9.07E-01	9.70E-01
Flavonoid_151	Sinensetin	Flavones	N/A	N/A	N/A	N/A	N/A	N/A	N/A	N/A	N/A	2.48E+00	2.45E+00
Flavonoid_155	Spinosin	Flavone glycosides	N/A	N/A	N/A	N/A	N/A	N/A	N/A	N/A	N/A	6.73E-01	6.70E-01
Flavonoid_161	Diosmin	Flavones	N/A	N/A	N/A	N/A	N/A	N/A	N/A	N/A	N/A	2.65E-01	2.56E-01
Flavonoid_168	5,7,3',4'-Tetramethoxyflavone	Flavones	N/A	N/A	N/A	N/A	N/A	N/A	N/A	N/A	N/A	2.03E+00	2.07E+00
Flavonoid_183	2'-Hydroxygenistein	Isoflavanones	N/A	N/A	N/A	N/A	N/A	N/A	N/A	N/A	N/A	1.13E+00	1.15E+00
Flavonoid_19	beta-Mangostin	Xanthones	N/A	N/A	N/A	N/A	N/A	N/A	N/A	N/A	N/A	4.12E-01	4.48E-01
Flavonoid_192	Orientin	Flavone glycosides	N/A	N/A	N/A	N/A	N/A	N/A	N/A	N/A	N/A	2.68E+00	2.37E+00
Flavonoid_199	Persicogenin	Flavanones	N/A	N/A	N/A	N/A	N/A	N/A	N/A	N/A	N/A	1.74E+00	1.80E+00
Flavonoid_20	Sagittatoside A	Flavonols	N/A	N/A	N/A	N/A	N/A	N/A	N/A	N/A	N/A	2.69E+00	2.66E+00
Flavonoid_204	Linarin	Flavones	N/A	N/A	N/A	N/A	N/A	N/A	N/A	N/A	N/A	1.04E+00	7.74E-01
Flavonoid_21	Tangeretin	Flavones	N/A	N/A	N/A	N/A	N/A	N/A	N/A	N/A	N/A	3.11E+00	3.16E+00
Flavonoid_26	Formononetin	Isoflavanones	N/A	N/A	N/A	N/A	N/A	7.68E-04	N/A	N/A	N/A	1.83E+00	1.85E+00
Flavonoid_39	Trimethylapigenin	Flavones	N/A	N/A	N/A	N/A	N/A	N/A	N/A	N/A	N/A	1.79E+00	1.90E+00
Flavonoid_42	Nicotiflorin	Flavones	N/A	N/A	N/A	N/A	N/A	N/A	N/A	N/A	N/A	4.46E-01	4.47E-01
Flavonoid_46	Eupatorin	Flavones	N/A	N/A	N/A	N/A	N/A	N/A	N/A	N/A	N/A	2.13E+00	2.19E+00
Flavonoid_49	Baicalin	Flavones	N/A	N/A	N/A	N/A	N/A	N/A	N/A	N/A	N/A	2.16E+00	2.08E+00
Flavonoid_78	Eriocitrin	Flavanones	N/A	N/A	N/A	N/A	N/A	N/A	N/A	N/A	N/A	7.35E-01	6.81E-01
Flavonoid_81	Tricin	Flavones	N/A	N/A	N/A	N/A	N/A	N/A	N/A	N/A	N/A	1.19E+00	1.19E+00
Flavonoid_08	5-Methyl-7-methoxyisoflavone	Isoflavanones	N/A	N/A	N/A	N/A	N/A	N/A	N/A	N/A	N/A	1.25E+00	1.22E+00
Flavonoid_09	Genistein	Isoflavanones	N/A	N/A	N/A	N/A	N/A	N/A	N/A	N/A	N/A	8.27E-01	8.64E-01
Flavonoid_101	Hesperidin	Flavanones	N/A	N/A	N/A	N/A	N/A	N/A	N/A	N/A	N/A	1.63E-01	1.56E-01
Flavonoid_104	Corylin	Isoflavanones	N/A	N/A	N/A	N/A	N/A	N/A	N/A	N/A	N/A	2.01E+00	1.93E+00
Flavonoid_107	Wogonin	Flavones	N/A	N/A	N/A	N/A	N/A	N/A	N/A	N/A	N/A	2.20E+00	2.21E+00
Flavonoid_109	Deguelin	-	N/A	N/A	N/A	N/A	N/A	N/A	N/A	N/A	N/A	3.17E+00	3.03E+00
Flavonoid_120	Bavachinin	Flavanones	N/A	N/A	N/A	N/A	N/A	N/A	N/A	N/A	N/A	1.68E+00	1.65E+00
Flavonoid_124	Silychristin	Flavanonols	N/A	N/A	N/A	N/A	N/A	N/A	N/A	N/A	N/A	6.75E-01	6.66E-01
Flavonoid_127	Daidzein	Isoflavanones	N/A	N/A	N/A	N/A	N/A	N/A	N/A	N/A	N/A	2.64E+00	2.65E+00
Flavonoid_128	5-Hydroxyflavone	Flavones	N/A	N/A	N/A	N/A	N/A	N/A	N/A	N/A	N/A	2.11E+00	2.03E+00
Flavonoid_131	Neobavaisoflavone	Isoflavanones	N/A	N/A	N/A	N/A	N/A	N/A	N/A	N/A	N/A	1.98E+00	1.91E+00
Flavonoid_132	Alpinetin	Flavanones	N/A	N/A	N/A	N/A	N/A	N/A	N/A	N/A	N/A	1.68E+00	1.63E+00
Flavonoid_134	Loureirin B	Chalcones	N/A	N/A	N/A	N/A	N/A	N/A	N/A	N/A	N/A	2.05E+00	2.01E+00
Flavonoid_136	6,2'-Dihydroxyflavone	Flavones	N/A	N/A	N/A	N/A	N/A	N/A	N/A	N/A	N/A	7.58E-01	7.47E-01
Flavonoid_144	Kavain	Phenonic acids	N/A	N/A	N/A	N/A	N/A	N/A	N/A	N/A	N/A	2.79E+00	2.84E+00
Flavonoid_147	(-)-Epicatechin	Flavanols	N/A	N/A	N/A	N/A	N/A	N/A	N/A	N/A	N/A	7.42E-01	8.00E-01
Flavonoid_148	Baohuoside I	Flavonols	N/A	N/A	N/A	N/A	N/A	N/A	N/A	N/A	N/A	2.76E+00	2.63E+00
Flavonoid_149	Farrerol	Flavanones	N/A	N/A	N/A	N/A	N/A	N/A	N/A	N/A	N/A	1.75E+00	1.74E+00
Flavonoid_152	Ononin	Isoflavanones	N/A	N/A	N/A	N/A	N/A	N/A	N/A	N/A	N/A	4.23E-01	3.91E-01
Flavonoid_153	Glycitin	Isoflavanones	N/A	N/A	N/A	N/A	N/A	N/A	N/A	N/A	N/A	1.70E-01	1.52E-01
Flavonoid_156	Wogonoside	Flavones	N/A	N/A	N/A	N/A	N/A	N/A	N/A	N/A	N/A	1.68E+00	1.69E+00
Flavonoid_163	4'-Hydroxychalcone	Chalcones	N/A	N/A	N/A	N/A	N/A	N/A	N/A	N/A	N/A	2.02E+00	2.03E+00
Flavonoid_164	5-Methoxyflavone	Flavones	N/A	N/A	N/A	N/A	N/A	N/A	N/A	N/A	N/A	1.83E+00	1.84E+00
Flavonoid_172	Kaempferitrin	Flavonols	N/A	N/A	N/A	N/A	N/A	N/A	N/A	N/A	N/A	2.17E-01	2.17E-01
Flavonoid_174	Glabridin	Isoflavanones	N/A	N/A	N/A	N/A	N/A	N/A	N/A	N/A	N/A	1.96E+00	1.92E+00
Flavonoid_178	Myricitrin	Flavonols	N/A	N/A	N/A	N/A	N/A	N/A	N/A	N/A	N/A	8.18E-01	6.81E-01
Flavonoid_186	Prunetin	Isoflavanones	N/A	N/A	N/A	N/A	N/A	N/A	N/A	N/A	N/A	2.14E+00	2.14E+00
Flavonoid_187	Tricetin	Flavones	N/A	N/A	N/A	N/A	N/A	N/A	N/A	N/A	N/A	1.52E+00	1.54E+00
Flavonoid_195	(-)-Gallocatechin	Flavanols	N/A	N/A	N/A	N/A	N/A	N/A	N/A	N/A	N/A	1.32E+00	1.29E+00
Flavonoid_196	Pedalitin	Flavones	N/A	N/A	N/A	N/A	N/A	N/A	N/A	N/A	N/A	1.45E+00	1.48E+00
Flavonoid_198	5,7-Dihydroxy-3',4',5'-trimethoxyflavone	Flavones	N/A	N/A	N/A	N/A	N/A	N/A	N/A	N/A	N/A	2.54E+00	2.56E+00
Flavonoid_203	Limocitrin	Flavones	N/A	N/A	N/A	N/A	N/A	N/A	N/A	N/A	N/A	7.34E-01	7.14E-01
Flavonoid_22	Neohesperidin dihydrochalcone	Chalcones	N/A	N/A	N/A	N/A	N/A	N/A	N/A	N/A	N/A	1.92E+00	1.83E+00
Flavonoid_24	4',5-Dihydroxyflavone	Flavones	N/A	N/A	N/A	N/A	N/A	N/A	N/A	N/A	N/A	1.87E+00	1.84E+00
Flavonoid_27	Flavonol	Flavonols	N/A	N/A	N/A	N/A	N/A	N/A	N/A	N/A	N/A	4.51E+00	4.37E+00
Flavonoid_31	Naringin Dihydrochalcone	Chalcones	N/A	N/A	N/A	N/A	N/A	N/A	N/A	N/A	N/A	2.05E+00	1.94E+00
Flavonoid_33	Oroxin A	Flavones	N/A	N/A	N/A	N/A	N/A	N/A	N/A	N/A	N/A	1.44E+00	1.54E+00
Flavonoid_37	Kurarinone	Other flavonoids	N/A	N/A	N/A	N/A	N/A	N/A	N/A	N/A	N/A	2.21E+00	2.18E+00
Flavonoid_51	3'-Methoxypuerarin	Flavone glycosides	N/A	N/A	N/A	N/A	N/A	N/A	N/A	N/A	N/A	9.30E-01	9.44E-01
Flavonoid_55	(-)-Catechin	Flavanols	N/A	N/A	N/A	N/A	N/A	N/A	N/A	N/A	N/A	4.98E-01	4.77E-01
Flavonoid_64	Scutellarein	Flavones	N/A	N/A	N/A	N/A	N/A	N/A	N/A	N/A	N/A	2.97E+00	2.63E+00
Flavonoid_66	Puerarin	Isoflavanones	N/A	N/A	N/A	N/A	N/A	N/A	N/A	N/A	N/A	1.02E+00	1.06E+00
Flavonoid_68	Mangiferin	Xanthones	N/A	N/A	N/A	N/A	N/A	N/A	N/A	N/A	N/A	1.91E+00	1.89E+00
Flavonoid_70	Licochalcone E	Chalcones	N/A	N/A	N/A	N/A	N/A	N/A	N/A	N/A	N/A	1.87E+00	1.91E+00
Flavonoid_71	Galangin	Flavones	N/A	N/A	N/A	N/A	N/A	N/A	N/A	N/A	N/A	2.05E+00	2.07E+00
Flavonoid_75	Licochalcone C	Chalcones	N/A	N/A	N/A	N/A	N/A	N/A	N/A	N/A	N/A	1.89E+00	1.93E+00
Flavonoid_77	Epimedin A	-	N/A	N/A	N/A	N/A	N/A	N/A	N/A	N/A	N/A	1.77E+00	1.87E+00
Flavonoid_79	Ligustroflavone	Phenonic acids	N/A	N/A	N/A	N/A	N/A	N/A	N/A	N/A	N/A	2.49E-01	2.75E-01
Flavonoid_80	(-)-Gallocatechin gallate	Flavanols	N/A	N/A	N/A	N/A	N/A	N/A	N/A	N/A	N/A	8.25E-01	8.98E-01
Flavonoid_83	Epmedin C	-	N/A	N/A	N/A	N/A	N/A	N/A	N/A	N/A	N/A	1.54E+00	1.80E+00
Flavonoid_87	Noricaritin	Flavonols	N/A	N/A	N/A	N/A	N/A	N/A	N/A	N/A	N/A	1.99E+00	1.93E+00
Flavonoid_93	Bavachin	Flavanones	N/A	N/A	N/A	N/A	N/A	N/A	N/A	N/A	N/A	1.97E+00	1.92E+00
Flavonoid_94	Epimedin B	-	N/A	N/A	N/A	N/A	N/A	N/A	N/A	N/A	N/A	2.25E+00	1.93E+00
Flavonoid_95	Calycosin	Isoflavanones	N/A	N/A	N/A	N/A	N/A	N/A	N/A	N/A	N/A	1.29E+00	1.27E+00
Flavonoid_96	Calycosin-7-O-β-D-glucoside	Isoflavanones	N/A	N/A	N/A	N/A	N/A	N/A	N/A	N/A	N/A	1.47E-01	1.23E-01
Flavonoid_113	Taxifolin 7-O-rhamnoside	Flavanonols	N/A	N/A	N/A	N/A	N/A	N/A	N/A	N/A	N/A	N/A	N/A
Flavonoid_119	Astragalin	Flavonols	N/A	N/A	N/A	N/A	N/A	N/A	N/A	N/A	N/A	N/A	N/A
Flavonoid_141	Isosakuranin	Flavanones	N/A	N/A	N/A	N/A	N/A	N/A	N/A	N/A	N/A	N/A	N/A
Flavonoid_202	Sieboldin	Chalcones	N/A	N/A	N/A	N/A	N/A	N/A	N/A	N/A	N/A	N/A	N/A
Flavonoid_65	Phlorizin	Chalcones	N/A	N/A	N/A	N/A	N/A	N/A	N/A	N/A	N/A	N/A	N/A
Flavonoid_85	Methylnissolin-3-O-glucoside	-	N/A	N/A	N/A	N/A	N/A	N/A	N/A	N/A	N/A	N/A	N/A
Flavonoid_01	Astilbin	Flavanonols	N/A	N/A	N/A	N/A	N/A	N/A	N/A	N/A	N/A	N/A	N/A
Flavonoid_102	Theaflavin	-	N/A	N/A	N/A	N/A	N/A	N/A	N/A	N/A	N/A	N/A	N/A
Flavonoid_180	Spiraeoside	Flavonols	N/A	N/A	N/A	N/A	N/A	N/A	N/A	N/A	N/A	N/A	N/A
Flavonoid_45	3,7,4'-Trihydroxyflavone	Flavonols	N/A	N/A	N/A	N/A	N/A	N/A	N/A	N/A	N/A	N/A	N/A
Flavonoid_67	Fisetin	Flavonols	N/A	N/A	N/A	N/A	N/A	N/A	N/A	N/A	N/A	N/A	N/A
Flavonoid_92	Myricetin	Flavonols	N/A	N/A	N/A	N/A	N/A	N/A	N/A	N/A	N/A	N/A	N/A
