# Supplementary material for: Metabolomics study of flavonoids in Coreopsis tinctoria of different origins by UPLC–MS/MS
Source: PeerJ. 2022 Dec 19;10:e14580. doi: 10.7717/peerj.14580 (PMC9774014; doi:10.7717/peerj.14580)
Supplement: Supplemental Information 2 [file peerj-10-14580-s002.xlsx]

## Sheet: TX vs YT
Index	Compounds	Class	TX-1	TX-2	TX-3	YT-1	YT-2	YT-3	VIP	Fold_Change	Log2FC	Type
Flavonoid_04	Isosilybin	Flavanonols	0.0377236233	N/A	N/A	0.0723929774	0.0940289751	0.0621374197	1.0080932	2.0196	1.0141	up
Flavonoid_06	Diosmetin	Flavones	14.7184508	11.8577906	9.79106455	6.4043771	5.83421935	4.46025704	1.15404597	0.4592	-1.1228	down
Flavonoid_23	Quercetin	Flavonols	95.5501801	90.2879884	98.7037572	24.3768639	27.3431513	20.151829	1.23422117	0.2526	-1.9851	down
Flavonoid_32	Daidzin	Isoflavanones	0.14206665	0.170923058	0.128205925	0.286433381	0.423675766	0.392056352	1.19430266	2.4981	1.3208	up
Flavonoid_43	Kaempferol	Flavonols	7.17828101	4.73273034	7.06247592	1.80962482	2.07889128	2.08803262	1.19463687	0.315	-1.6666	down
Flavonoid_56	Taxifolin	Flavanonols	209.406073	220.775929	217.916426	114.705868	87.0057471	97.6989619	1.23378072	0.462	-1.114	down
Flavonoid_58	Isorhamnetin	Flavonols	1.90795162	1.71148336	1.47929672	0.321096681	0.54868295	0.337254078	1.19854293	0.2367	-2.0789	down
Flavonoid_59	Hispidulin	Flavones	0.172620432	0.182339363	0.131375963	0.0637400192	0.0703311782	0.052945131	1.20511764	0.3845	-1.3789	down
Flavonoid_63	Tectorigenin	Isoflavanones	0.208331704	0.149467197	0.142635838	0.0788066378	0.0776613985	0.0572936233	1.16246008	0.4272	-1.227	down
Flavonoid_86	Avicularin	Flavonols	4.74078744	4.32368548	4.54971098	1.75791967	2.35818008	1.60984676	1.19410538	0.4206	-1.2495	down
Flavonoid_108	Pinocembrin	Flavanones	5.69076171	4.32378196	3.93574181	2.2459115	1.94810345	2.33869254	1.18085408	0.4683	-1.0945	down
Flavonoid_165	Homoplantaginin	Flavones	1.51158775	1.00912928	0.999891618	0.527979798	0.505914751	0.489792388	1.17221086	0.4328	-1.2082	down
Flavonoid_167	Oroxin B	Flavones	0.0360486361	0.0311430294	0.0328427264	0.0772508418	0.0711704981	0.0696744933	1.23811703	2.1802	1.1245	up
Flavonoid_169	Quercetin 3-O-(6''-galloyl)-β-D-galactopyranoside	Flavonols	0.34257334	0.327715871	0.290019268	0.183057961	0.102520594	0.162122343	1.14993207	0.4662	-1.101	down
Flavonoid_175	Afzelin	Flavonols	0.0158715646	0.0104416305	0.0184012524	0.044996152	0.0531295498	0.0770479486	1.19692289	3.9176	1.97	up
Flavonoid_188	Laricitrin	Flavonols	20.4294133	20.2746503	13.0586946	8.94992785	6.97789751	7.83430549	1.16564576	0.442	-1.1779	down
Flavonoid_194	Quercimeritrin	Flavonols	106.410448	97.2551857	104.750241	45.8588264	39.7641284	58.9797331	1.19172083	0.4689	-1.0926	down
Flavonoid_197	Isorhamnetin 3-O-glucoside	Flavonols	4.51863098	3.81946454	4.78764451	1.14235931	1.27869492	1.79089718	1.19704997	0.3209	-1.6398	down
Flavonoid_200	Benzylideneacetophenone	Chalcones	0.0108602676	0.00579394597	0.00663668112	0.0241568062	0.0168774904	0.0211579585	1.15212939	2.6702	1.4169	up

## Sheet: TX vs SY
Index	Compounds	Class	TX-1	TX-2	TX-3	SY-1	SY-2	SY-3	VIP	Fold_Change	Log2FC	Type
Flavonoid_03	4,4'-Dimethoxychalcone	Chalcones	0.0063841739600000004	0.00396876507	0.00525628613	0.0222277606	0.0301938085	0.017699775	1.23794096	4.4923	2.1675	up
Flavonoid_12	Liquiritigenin	Flavanones	0.274009264	0.244611674	0.271006744	0.563859649	0.56201873	0.5228675	1.27091319	2.088	1.0621	up
Flavonoid_23	Quercetin	Flavonols	95.5501801	90.2879884	98.7037572	42.1929825	36.7330905	36.442	1.2735293	0.4055	-1.3022	down
Flavonoid_43	Kaempferol	Flavonols	7.17828101	4.73273034	7.06247592	2.16005676	2.32034599	2.3965425	1.22626506	0.3625	-1.4639	down
Flavonoid_57	Rutin	Flavonols	0.248345857	0.244956585	0.367066474	0.377376161	0.771467222	0.96202	1.04448891	2.4534	1.2948	up
Flavonoid_58	Isorhamnetin	Flavonols	1.90795162	1.71148336	1.47929672	0.752776058	0.441599896	0.52666	1.2281764	0.3375	-1.567	down
Flavonoid_86	Avicularin	Flavonols	4.74078744	4.32368548	4.54971098	1.6444711	1.11618887	1.7210975	1.24523432	0.3292	-1.603	down
Flavonoid_143	Jaceosidin	Flavones	0.0439613999	0.0377334781	0.0363415222	0.083748452	0.131023673	0.0630125	1.13100968	2.3534	1.2347	up
Flavonoid_157	Isomangiferin	Xanthones	0.371006176	0.280557164	0.295146917	0.140915635	0.153008845	0.1385635	1.23930092	0.4568	-1.1304	down
Flavonoid_165	Homoplantaginin	Flavones	1.51158775	1.00912928	0.999891618	0.647143963	0.357367326	0.4395975	1.15511388	0.4102	-1.2856	down
Flavonoid_169	Quercetin 3-O-(6''-galloyl)-β-D-galactopyranoside	Flavonols	0.34257334	0.327715871	0.290019268	0.128272446	0.243933663	0.1004675	1.04370128	0.4922	-1.0227	down
Flavonoid_190	7,4'-Dihydroxyflavone	Flavones	0.0481518271	0.0152062229	0.0309903661	0.177300052	0.122635796	0.05791925	1.04530295	3.7929	1.9233	up
Flavonoid_194	Quercimeritrin	Flavonols	106.410448	97.2551857	104.750241	33.8648091	65.8046306	26.92375	1.10929927	0.4105	-1.2845	down
Flavonoid_197	Isorhamnetin 3-O-glucoside	Flavonols	4.51863098	3.81946454	4.78764451	1.62095975	1.85645682	1.1192	1.22189493	0.3502	-1.5137	down
Flavonoid_200	Benzylideneacetophenone	Chalcones	0.0108602676	0.00579394597	0.00663668112	0.0216115583	0.0200104839	0.02625525	1.20509946	2.9143	1.5431	up

## Sheet: YT vs SY
Index	Compounds	Class	YT-1	YT-2	YT-3	SY-1	SY-2	SY-3	VIP	Fold_Change	Log2FC	Type
Flavonoid_03	4,4'-Dimethoxychalcone	Chalcones	0.00651604137	0.00532080939	0.00875565991	0.0222277606	0.0301938085	0.017699775	1.38225252	3.4052	1.7677	up
Flavonoid_41	Hesperetin	Flavanones	0.0269853295	0.0164880268	0.02959565	0.0854721362	0.0308116545	0.0482175	1.07943439	2.2513	1.1708	up
Flavonoid_54	Isorhamnetin-3-O-neohespeidoside	Flavonols	0.00370759981	0.00881393678	0.00470771132	0.0073873065	0.0173418314	0.0165577	1.11189658	2.3963	1.2608	up
Flavonoid_59	Hispidulin	Flavones	0.0637400192	0.0703311782	0.052945131	0.216516254	0.436930281	0.1025625	1.2031138	4.0425	2.0152	up
Flavonoid_74	Schaftoside	Flavone glycosides	0.100187831	0.0983029215	0.178645082	0.69993808	0.185468783	0.3991775	1.16347277	3.4062	1.7682	up
Flavonoid_76	Sakuranetin	Flavones	0.00291948052	0.00251036877	0.00258442907	0.0736158411	0.021708923	0.03360375	1.41590769	16.0874	4.0079	up
Flavonoid_137	Tiliroside	Flavonols	0.0576551227	0.0840419061	0.061188087	0.126633127	0.140205775	0.144981	1.38927857	2.0298	1.0213	up
Flavonoid_175	Afzelin	Flavonols	0.044996152	0.0531295498	0.0770479486	0.0248690144	0.0275645161	0.0196121	1.3524611	0.4113	-1.2817	down
Flavonoid_179	Poncirin	Flavanones	0.0540882636	0.0723716475	0.0589280771	0.124611455	0.164559573	0.1370375	1.41081154	2.299	1.201	up
Flavonoid_190	7,4'-Dihydroxyflavone	Flavones	0.012800938	0.0255941092	0.0343895205	0.177300052	0.122635796	0.05791925	1.27416978	4.9166	2.2977	up
